# Supplementary material for: Super-hydrophobic and resilient hybrid silica aerogels for thermal insulation, energy harvesting, and electrical applications in harsh environments
Source: Royal Society of Chemistry journal article supplement (doi:10.1039/d3tc02862c), 2023-01-01
Supplement: d3tc02862c1.pdf [file d3tc02862c1.pdf]

1 **Super-Hydrophobic and Resilient Hybrid Silica Aerogels for Thermal Insulation, Energy**  
2 **Harvesting, and Electrical Applications in Harsh Environments**

3 Sasan Rezaei<sup>†</sup>, Hosseinali Omranpour<sup>†</sup>, Zeineb Ben Rejeb, Maryam Fashandi, Ali Reza  
4 Monfared, Reza Rahmati, Mohammad M. Rastegardoost, Hani E. Naguib, Chul B. Park\*

5 Department of Mechanical and Industrial Engineering, University of Toronto, Toronto, Ontario,  
6 Canada, M5S 3G8

7 \*Corresponding Author: [park@mie.utoronto.ca](mailto:park@mie.utoronto.ca)

8 <sup>†</sup>These two authors contributed equally to this work

9

10 ***Morphological analysis:***

11 The Density Functional Theory (DFT) method stands as a potent tool for determining pore  
12 size distributions in nanoporous solid materials. It has demonstrated its efficacy in providing a  
13 quantitative description of low-temperature N<sub>2</sub> adsorption on various materials. For accurately  
14 assessing pore size and pore size distribution (PSD) in materials featuring nanopores (those with  
15 widths smaller than 100 nm), methods grounded in statistical mechanics and molecular simulation,  
16 such as DFT, represent the current state-of-the-art. DFT-based techniques are widely embraced  
17 and commercially available across numerous gas adsorption systems used for measurement  
18 purposes. They offer a reliable means to estimate PSD over a range encompassing micro and  
19 mesopores. In contrast, classic methods like Barrett-Joyner-Halenda (BJH), Horvath-Kawazoe  
20 (HK), Saito-Foley (SF), and Dubinin-Radushkevich (DR) may not be suitable for the entire  
21 nanopore spectrum and have the potential to underestimate pore sizes below 10 nm in width.  
22 Considering these factors, and in alignment with the recommendations of the International  
23 Standard Organization (ISO), we have chosen to implement DFT as the preferred method for PSD  
24 measurements in this paper<sup>1,2</sup>.

25 During gas adsorption, a monolayer is formed on the sorbent's structure in low relative  
26 pressure. As the relative pressure is increased, fine pores are filled first, followed by the gas  
27 condensation and saturation of all pores. Consequently, the isotherm required for pore structure  
28 analysis is obtained. The DFT model considers the properties of the condensed gas on the pores  
29 such as the gas density to study the pore properties. The DFT, considers a specific geometry for  
30 each material type (i.e., slit for carbon-based, cylinder for silica based, etc.) and fits its theoretical  
31 isotherm to the data obtained from the experimental nitrogen adsorption isotherm using  
32 complicated fitting and regression procedures. The DFT model can be explained using Equation  
33 (1):

34 
$$N_{exp}(P/P_0) = \int_{D_m}^{D_M} N_{DFT}(P/P_0, D) \times F(D) dD \quad (1)$$

35 where  $N_{exp}(P/P_0)$  is the experimental adsorption isotherm,  $f(D)$  is a pore diameter distribution  
36 function, and  $D_m$  and  $D_M$  are minimum and maximum pore diameters in our model<sup>2</sup>. The basic  
37 formulations of the DFT approach can be found elsewhere<sup>3,4</sup>.

1 It is also worth mentioning that there is no distinct relationship between the pore width,  
2 pore volume and specific surface area. By assuming all pores having a cylindrical shape, the  
3 following equation can be used to estimate the pore size<sup>5</sup>:

$$D_{pore} \approx \frac{V_{pore}}{4S_{BET}} \quad (2)$$

4  
5 Equation 2 shows that pore width is a function of both pore volume and specific surface  
6 area. Hence, improvement of surface area or pore volume will not necessarily affect the pore width.  
7

### 8 ***Thermal imaging experiments:***

9 To conduct thermal imaging experiments, a thick insulation material with tubular hole was  
10 affixed to the hot plate to control heat convection. Subsequently, the samples were placed within  
11 this hole, and temperature at the center of each sample was recorded. In thermal images, the red  
12 circle is the visible portion of the hot plate. This circle served as a visual indicator for the reference  
13 temperature.

14  
15

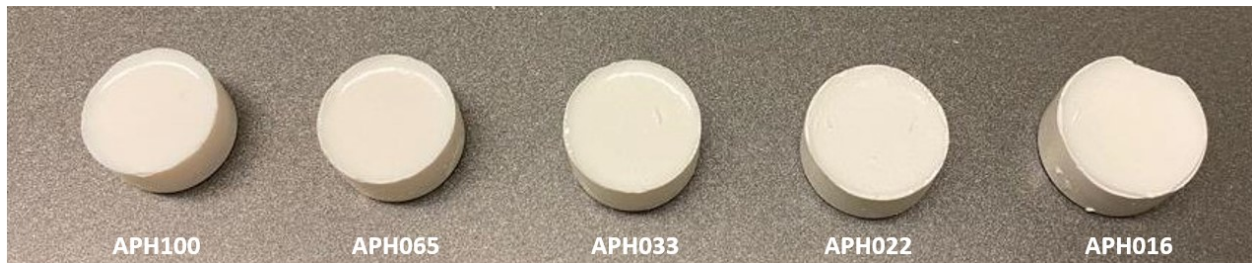

16  
17  
18  
19

Figure S1. The optical images of the samples depict the diverse degrees of contraction.

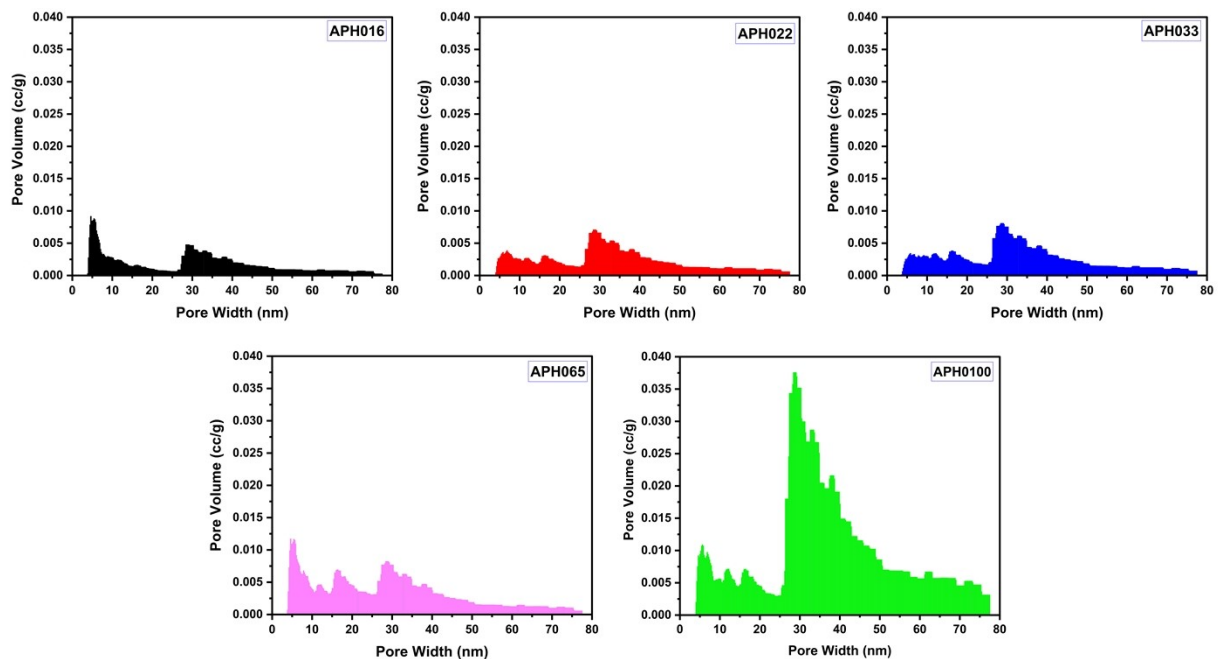

Figure S2: Linear pore size distribution and related pore volume for all samples.

1  
2  
3  
4

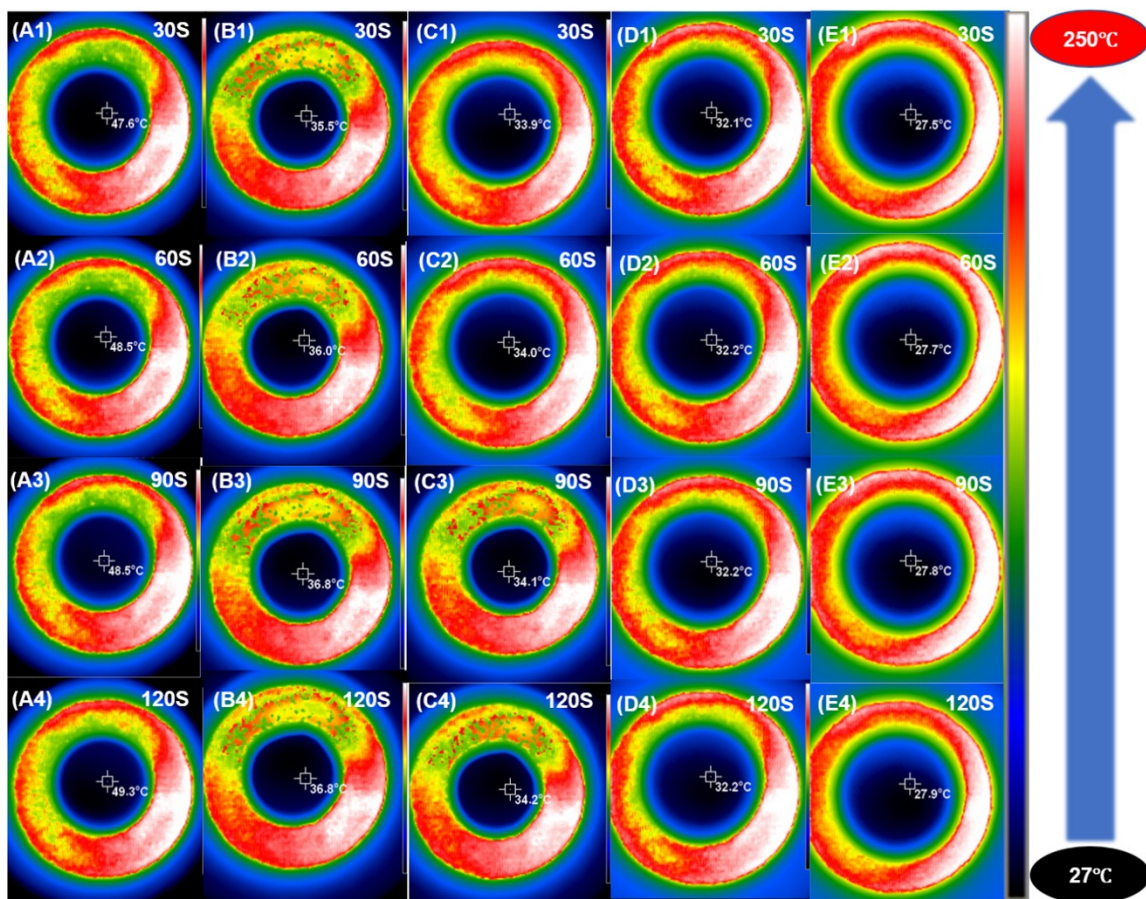

Figure S3. Thermal images of the samples captured at 30-second intervals, APH016 (A1-A4), APH022 (B1-B4), APH033 (C1-C4), APH065 (D1-D4), APH100 (E1-E4)

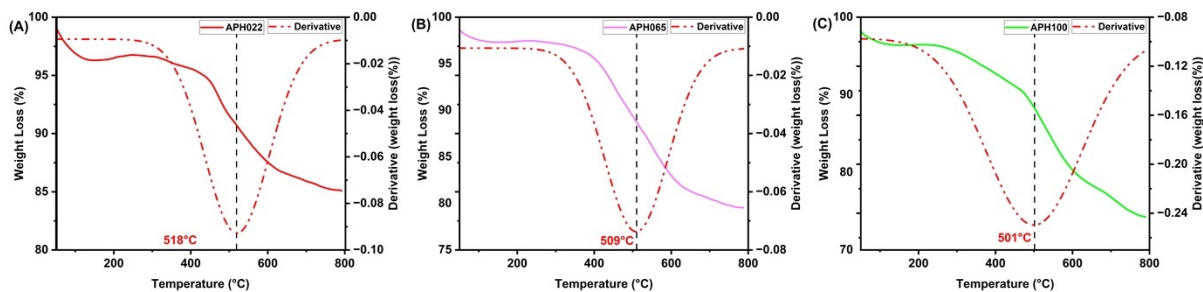

Figure S4. Thermal stability analyzed using TGA curves and their derivatives.

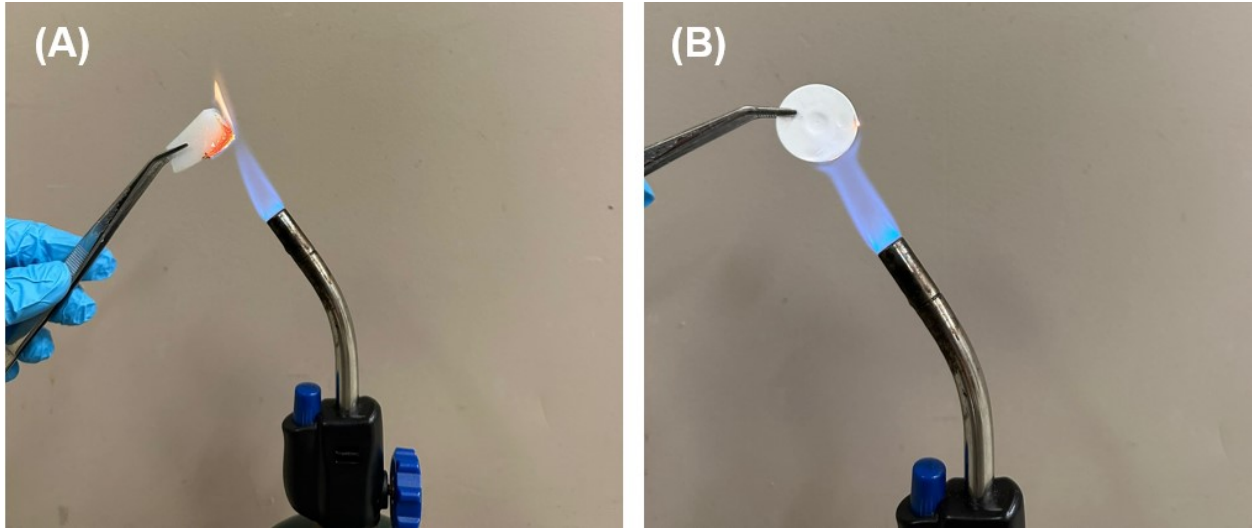

Figure S5. (A) PVTMS sample burns in fire, while (B) APH016 is more fire resistant.

1  
2  
3  
4  
5

**Densification Modulus:**

6 The densification modulus was computed for all specimens following the curvature point  
7 of the diagrams. In order to maintain consistency in the measurement procedure, reference points  
8 of 1 and 3.3 MPa were selected, except for sample APH022HC, where the maximum point is at  
9 2.12 MPa.

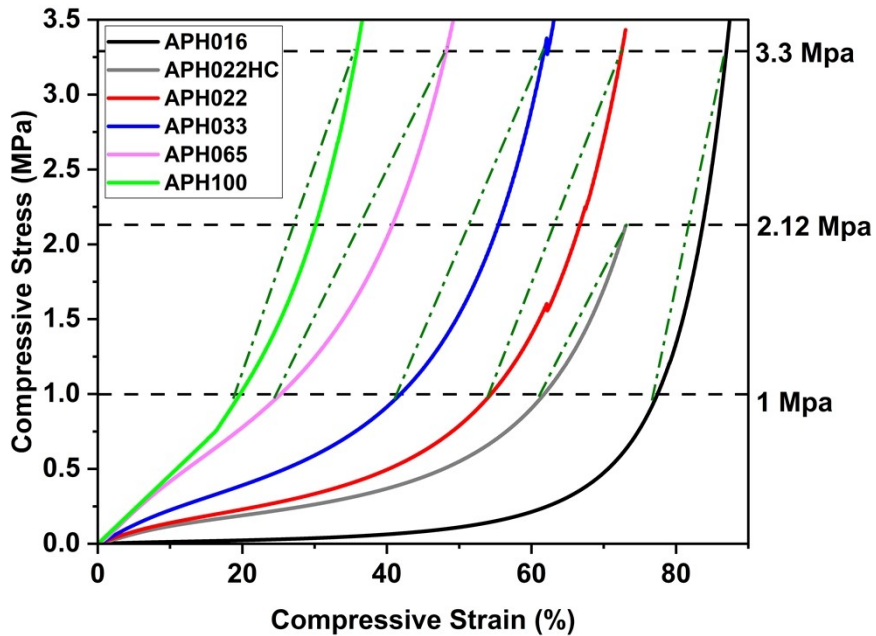

Figure S6. Densification modulus for specimens.

10  
11  
12

1 Table S1: Stress-strain values for calculating young and densification modulus and data points for comparing samples  
 2 at 15, 25, and 35 % strain.

| <b>APH016</b>     |                     | <b>APH022HC</b>   |                     | <b>APH022</b>     |                     | <b>APH033</b>     |                     | <b>APH065</b>     |                     | <b>APH100</b>     |                     |
|-------------------|---------------------|-------------------|---------------------|-------------------|---------------------|-------------------|---------------------|-------------------|---------------------|-------------------|---------------------|
| <b>Strain (%)</b> | <b>Stress (Mpa)</b> |
| <b>0</b>          | 0                   | 0                 | 0                   | 0                 | 0                   | 0                 | 0                   | 0                 | 0                   | 0                 | 0                   |
| <b>0.99</b>       | 0.00                | 1.00              | 0.01                | 0.99              | 0.02                | 0.99              | 0.02                | 0.99              | 0.03                | 0.99              | 0.04                |
| <b>1.00</b>       | 0.00                | 1.02              | 0.01                | 1.01              | 0.02                | 1.01              | 0.02                | 1.01              | 0.03                | 1.01              | 0.05                |
| <b>15.00</b>      | 0.02                | 15.01             | 0.16                | 15.01             | 0.19                | 15.01             | 0.31                | 15.01             | 0.59                | 15.01             | 0.69                |
| <b>25.00</b>      | 0.03                | 25.01             | 0.22                | 25.00             | 0.28                | 25.00             | 0.48                | 25.00             | 0.99                | 25.01             | 1.47                |
| <b>35.00</b>      | 0.05                | 35.01             | 0.31                | 35.01             | 0.40                | 35.01             | 0.73                | 35.01             | 1.58                | 35.00             | 3.09                |
| <b>77.45</b>      | 1.00                | 61.77             | 1.00                | 54.40             | 1.00                | 41.90             | 1.00                | 25.32             | 1.00                | 19.69             | 1.00                |
| <b>86.99</b>      | 3.30                | 73.04             | 2.12                | 72.55             | 3.30                | 61.79             | 3.30                | 48.30             | 3.30                | 35.87             | 3.30                |

3  
4

## 1 References:

- 2 1 ISO 15901-2:2022 - Pore size distribution and porosity of solid materials by mercury porosimetry and gas  
3 adsorption — Part 2: Analysis of nanopores by gas adsorption, <https://www.iso.org/standard/67586.html>.
- 4 2 R. Bardestani, G. S. Patience and S. Kaliaguine, *Can J Chem Eng*, 2019, **97**, 2781–2791.
- 5 3 J. Landers, G. Y. Gor and A. V. Neimark, *Colloids Surf A Physicochem Eng Asp*, 2013, **437**, 3–32.
- 6 4 P. I. Ravikovitch, G. L. Haller and A. V. Neimark, *Adv Colloid Interface Sci*, 1998, **76–77**, 203–226.
- 7 5 H. Maleki, S. Montes, N. Hayati-Roodbari, F. Putz and N. Huesing, *ACS Appl Mater Interfaces*, 2018, **10**,  
8 22718–22730.

9
